# Supplementary material
Source: Springer Nature journal article supplement (https://www.springermedizin.de/resource/supplementary/12936_2009_884_MOESM2_ESM.pdf/9548456)

*Complexity of P.falciparum  
isolates*

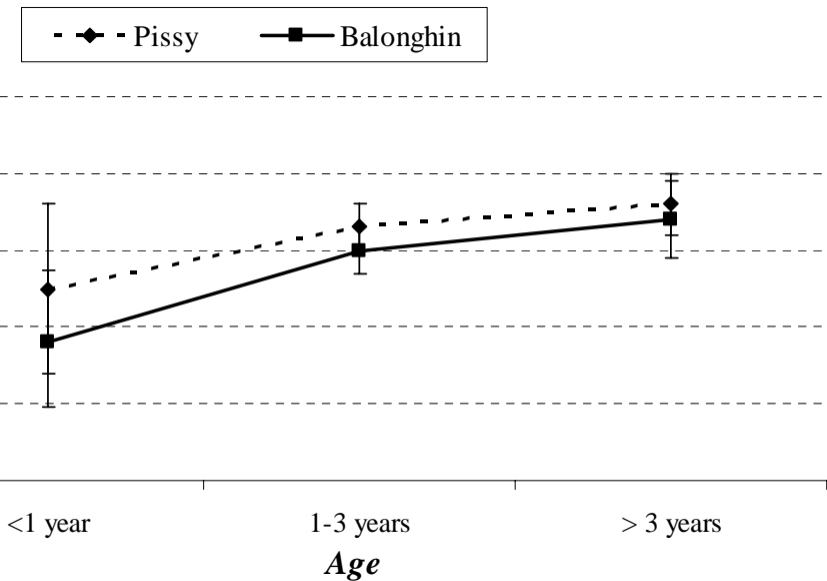

Supplement: MOESM2 [file 9548456]
